# Supplementary material for: A thermally etched N-doped porous layered silicon anode for improved cycling stability of lithium-ion batteries
Source: Royal Society of Chemistry journal article supplement (doi:10.1039/d3tc02218h), 2023-01-01
Supplement: d3tc02218h1.pdf [file d3tc02218h1.pdf]

# Supporting Information

## **Thermally-Etched N-doped Porous Layered Silicon Anode for Improved Cycling Stability of Lithium-Ion Batteries**

Bing Bai<sup>1</sup>, Linlin Qiu<sup>1,3</sup>, Yang Liu<sup>1</sup>, Zhiqin Su<sup>1</sup>, Lixin Song<sup>1</sup>, Pingfan Du<sup>1,2\*</sup>

<sup>1</sup> *College of Textile Science and Engineering, Zhejiang Sci-Tech University,  
Hangzhou 310018, P. R. China*

<sup>2</sup> *Key Laboratory of Intelligent Textile and Flexible Interconnection of Zhejiang  
Province, Zhejiang Sci-Tech University, Hangzhou 310018, P. R. China*

<sup>3</sup> *College of Textiles and Apparel, Quanzhou Normal University, China, Quanzhou  
362000, P. R. China*

Corresponding author at:

928 Second Avenue, Xiasha Higher Education Zone, Hangzhou 310018, China.

E-mail address: dupf@zstu.edu.cn (P. Du)

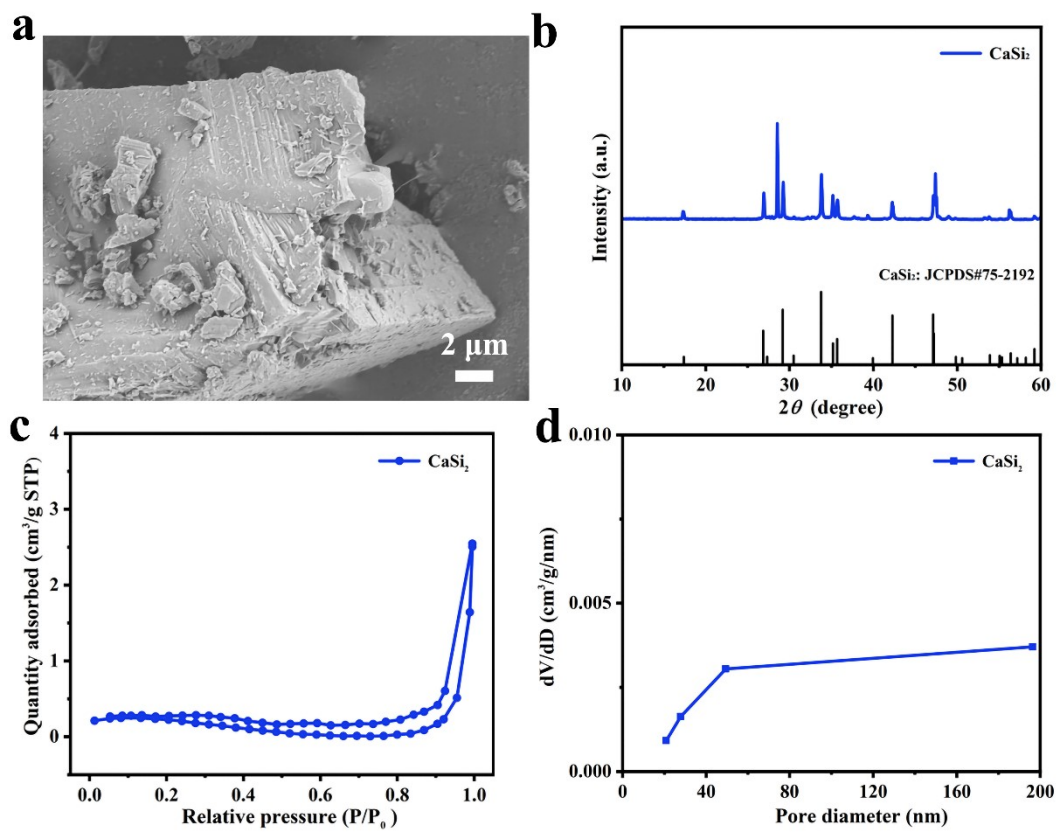

**Figure S1.** (a) SEM image, (b) XRD patterns, (c)  $\text{N}_2$  adsorption-desorption isotherm, and (d) pore size distribution of  $\text{CaSi}_2$ .

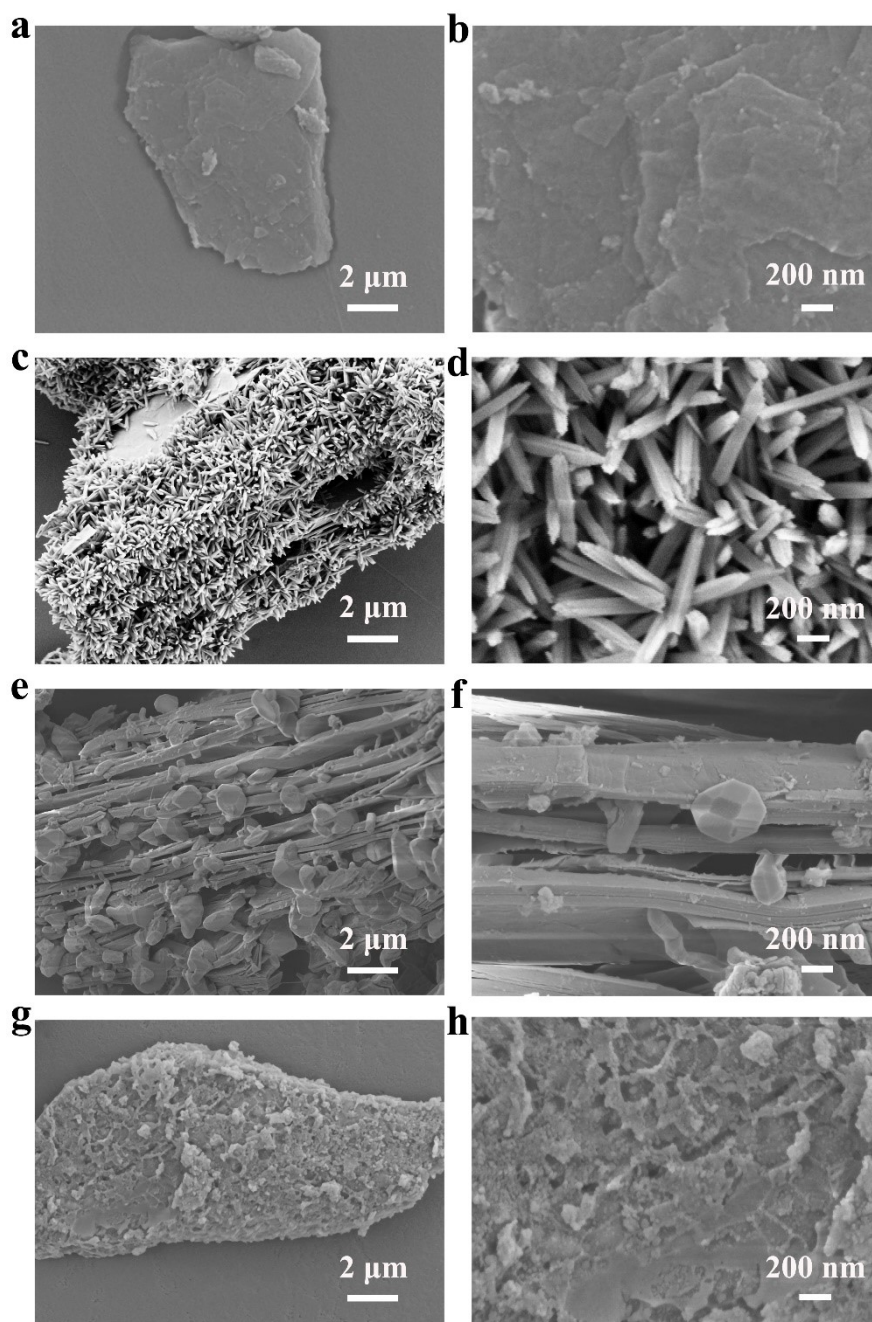

**Figure S2.** SEM images of (a-b) Si NFs, (c-d) FeOOH-Si NFs, (e-f) Fe<sub>3</sub>O<sub>4</sub>-Si NFs, and (g-h) P-Si NFs.

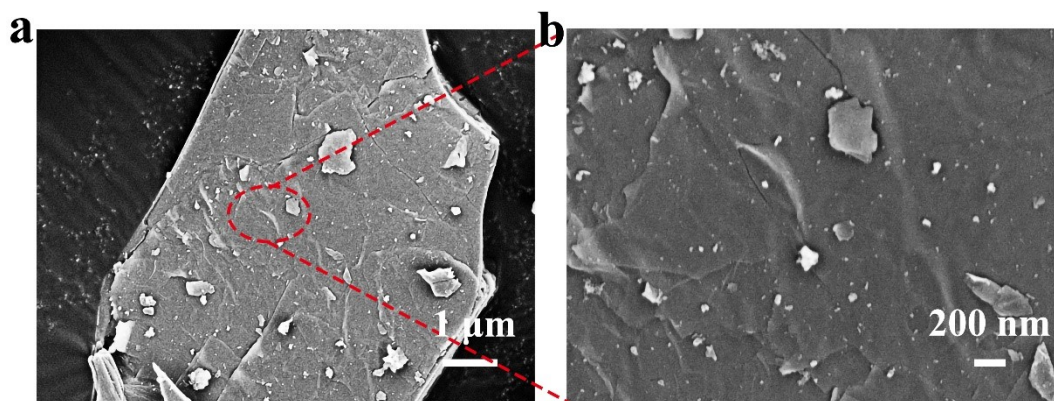

**Figure S3.** (a-b) SEM images of H-Si NFs.

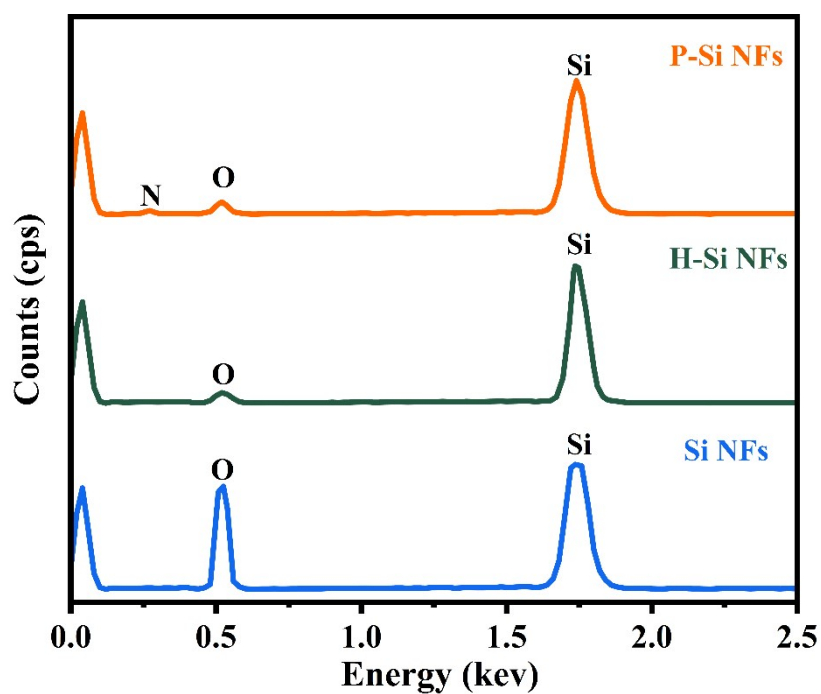

**Figure S4.** EDS spectra of Si NFs, H-Si NFs, and P-Si NFs.

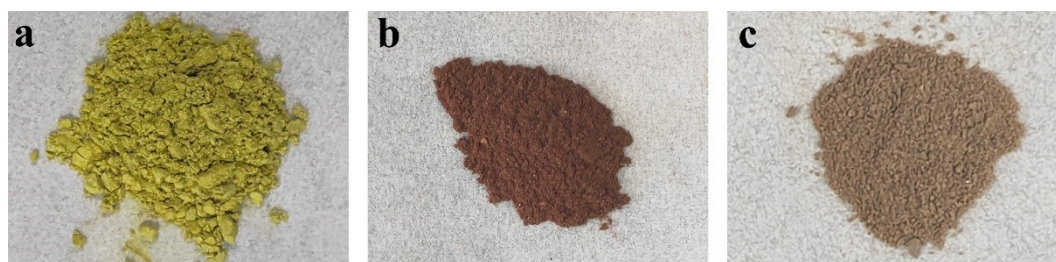

**Figure S5.** Photos of (a) Si NFs, (b) H-Si NFs, and (c) P-Si NFs.

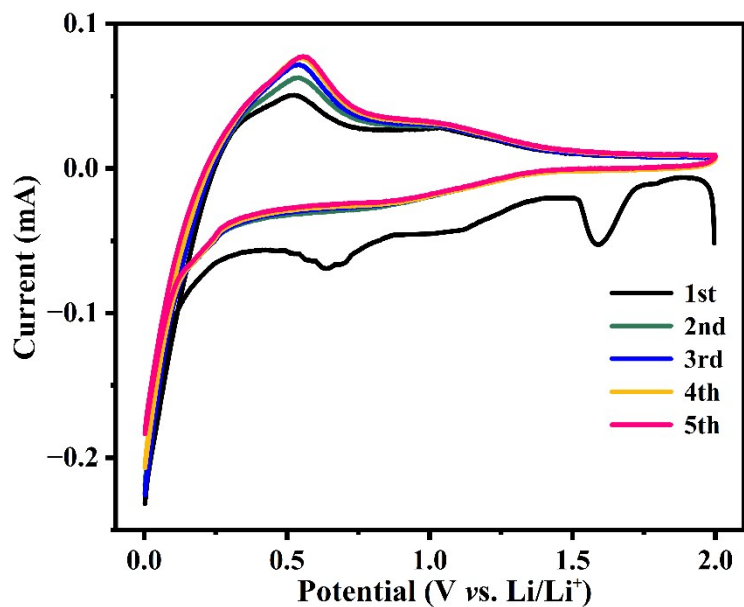

Figure S6. CV curves of the Si NFs anode.

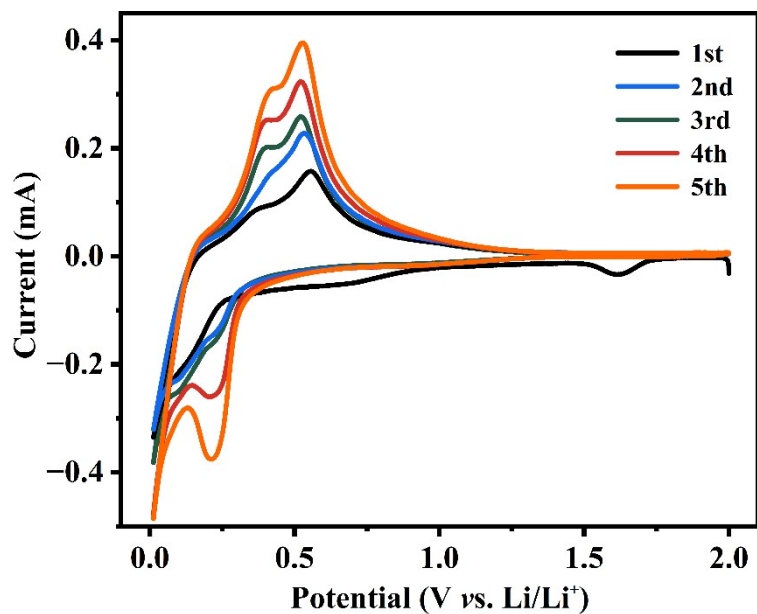

Figure S7. CV curves of the H-Si NFs anode.

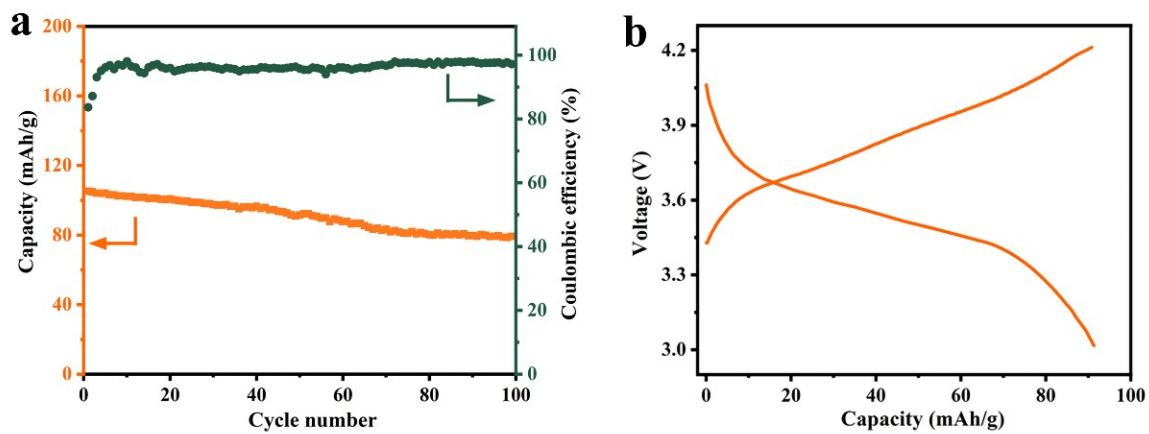

**Figure S8.** (a) The cycle performance of the P-Si NFs||LiCoO<sub>2</sub> full cell between 3.0 and 4.2 V at 1C (150 mAh/g at 1C). (b) Charge/discharge profiles of the 50th cycle at 1C.
